# Supplementary material for: Capturing the Kidney Transcriptome by Urinary Extracellular Vesicles—From Pre-Analytical Obstacles to Biomarker Research
Source: Genes (Basel). 2023 Jul 8;14(7):1415. doi: 10.3390/genes14071415 (PMC10379145; doi:10.3390/genes14071415)
Supplement: Supplementary file 1 [file genes-14-01415-s001.zip]

Archive with 4 entries (4 files):
- SF_Barreiro et al.pdf
- Table S1_Barreiro et al.xlsx
- Table S2_ Barreiro et al.xlsx
- Table S3_ Barreiro et al.xlsx
